# Supplementary material
Source: PubMed Central journal article supplement (PMC2859567)
Supplement: supp_M110.106666_Supporting_information_JBC_NMR_RI_In-Ja.pdf [file supp_M110.106666_Supporting_information_JBC_NMR_RI_In-Ja.pdf]

## Supporting information

**Table S1:** DLS data for RI $\alpha$ (98-381) at 22°C

| RI $\alpha$ (98-381) ( $\mu$ M) | [cAMP]<br>added<br>( $\mu$ M) | Hydrodynamic<br>Radius<br>(nm) | Mw | Polydispersity* | Intensity<br>(%)** |
|---------------------------------|-------------------------------|--------------------------------|----|-----------------|--------------------|
| cAMP-bound (740)                | --                            | 3.2                            | 50 | 11.8            | 96.9               |
| cAMP-bound (185)                | --                            | 3.3                            | 55 | 8.0             | 95.4               |
| cAMP-bound (23)                 | --                            | 3.3                            | 56 | 6.5             | 89.1               |
| Apo (23)                        | --                            | 3.8                            | 74 | 33.7            | 85.6               |
| Apo (23)                        | 100                           | 3.4                            | 58 | 4.0             | 97.6               |

The cAMP bound protein was purified as the ligand-bound form while for the *apo*-protein cAMP was removed by unfolding/folding (see text).

\*Higher numbers indicate the presence of aggregation

\*\*Percentage of total scattered intensity in sample

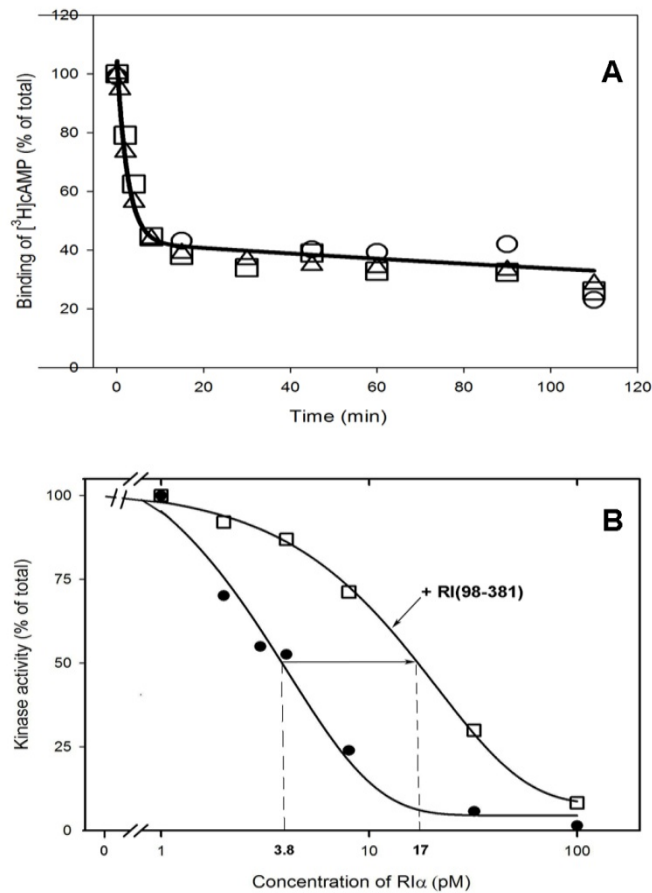

**Figure S1. cAMP binding to RI $\alpha$ (98-381) and kinase activity of the C subunit of PKA.** A, Exchange of [<sup>3</sup>H]cAMP bound to wt-RI $\alpha$  (O), RI $\alpha$ (92-381) ( $\Delta$ ), or RI $\alpha$ (98-381) ( $\square$ ). Note, all RI $\alpha$  variants exhibited two distinct similar phases. B, Kinase activity of the C subunit of PKA (3.8 pM) in the absence ( $\bullet$ ) or presence ( $\square$ ) of 500 pM RI $\alpha$ (98-381). Note that 4.5-fold more wt-RI $\alpha$  was required to inhibit the kinase in the presence of RI $\alpha$ (98-381).

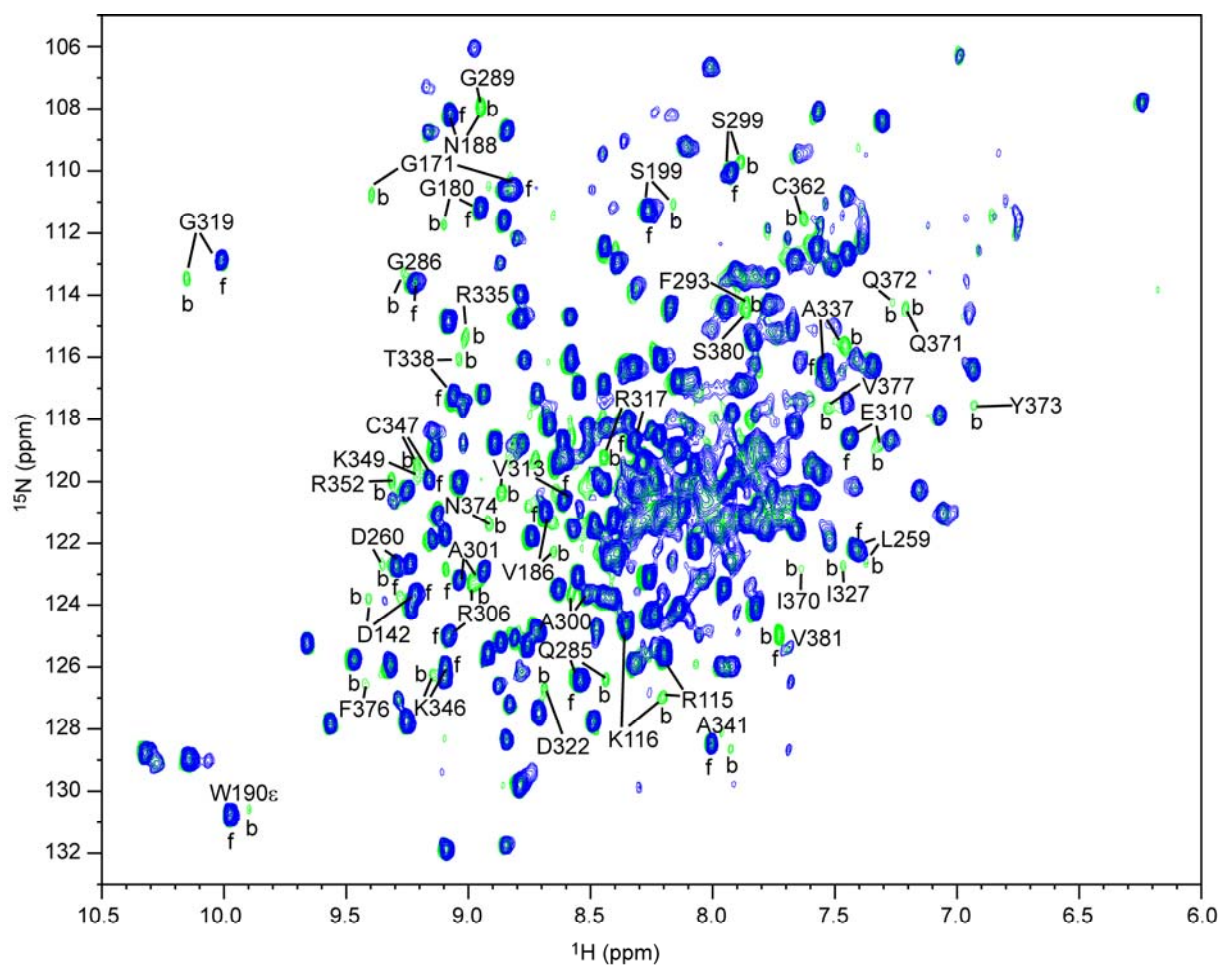

**Figure S2.**  $^1\text{H}$ - $^{15}\text{N}$  TROSY-HSQC spectra of RI $\alpha$ (98-381) in the presence of trace amounts of cAMP. Superpositions of the  $^1\text{H}$ - $^{15}\text{N}$  TROSY-HSQC spectra recorded on 50  $\mu\text{M}$  U- $[\text{}^2\text{H}/\text{}^{13}\text{C}/\text{}^{15}\text{N}]$ -labelled RI $\alpha$ (98-381) samples at 30°C in the absence (blue, identical to the spectrum shown in Figure 2A) and presence of trace amounts of cAMP (green). Assignments are given by residue name and number and the cAMP-free and cAMP-bound RI $\alpha$ (98-381) resonances are labeled by ‘f’ and ‘b’, respectively.
